# Supplementary material
Source: PubMed Central journal article supplement (PMC7963639)
Supplement: 16-01220.pdf [file 16-01220.pdf]

## ON-LINE APPENDIX

### Materials and Methods

**Smoker Score.** The score includes the evaluation of 3 aspects of basilar artery dolichoectasia on axial T2 images:

Diameter (0 = <4.5 mm, 1 = ≥4.5 mm)

Laterality: (0 = midline throughout, 1 = medial to the lateral margin of clivus or dorsum sellae, 2 = lateral to lateral margin of clivus or dorsum sellae, 3 = at the cerebellopontine angle).

Height of bifurcation: (0 = at or below the dorsum sellae, 1 = within the suprasellar cistern [1 cut above the dorsum sellae], 2 = at the third ventricle floor [1 cut above suprasellar cistern], 3 = indenting and elevating the third ventricle floor [≥2 cuts above suprasellar cistern]).

The Smoker score ranges between 0 (normal) and 7 (marked dolichoectasia).

**Curved Length and Linear Length Measurement.** The step-by-step procedure to measure basilar artery length and tortuosity in the present study was the following:

1) All MRA native axial partitions were loaded into commercially available software (syngo MultiModality Workplace; Siemens).

2) The function Inspace Window was activated obtaining interactive 3D multiplanar reconstructions.

3) The “Vessel Analysis” menu was opened, and 2 anatomic basilar artery landmarks were identified on the basis of multiplanar and maximum-intensity-projection 3D reconstructions: 1) the confluence of the vertebral arteries (proximal/caudal basilar artery extremity), and 2) the bifurcation of the basilar artery into the posterior cerebral arteries (distal/rostral basilar artery extremity).

4) After setting the 2 above-mentioned landmarks with the function “Trace,” the software automatically provided a curved line following the vessel path according to the different signal intensity of the basilar artery compared with the surrounding parenchymal structures and subarachnoid spaces. The exact correspondence between the line and the vessel course was accurately verified in all space dimensions.

5) Whenever the correspondence between the basilar artery and the curved line was suboptimal, the operator adjusted the course of the line manually, activating the function “Edit”: This function shows several square dots along the curved line that can be manually positioned centrally in the vessel lumen until the curved line follows the vessel along its whole course (additional square dots can be placed if needed).

6) When the functions “Measure” and “Curve” are activated, the software provides the length in millimeters of the curved line running from the proximal and distal basilar artery extremities (curved length). After we recorded the measure, we deleted all the square dots except the proximal and distal extremes, obtaining a straight line joining the remaining 2 square dots. The software provided the corresponding measure in millimeters (linear length), which was also recorded. The tortuosity index was eventually calculated according to the following formula:

Tortuosity Index = (Curved length/Linear length) – 1.

## REFERENCES OF LITERATURE REVIEW

- Agertt F, Crippa AC, Lorenzoni PJ, et al. **Menkes' disease: case report.** *Arq Neuropsiquiatr* 2007;65:157–60 CrossRef Medline
- Barnerias C, Boddaert N, Guiraud P, et al. **Unusual magnetic resonance imaging features in Menkes disease.** *Brain Dev* 2008;30:489–92 CrossRef Medline
- Bekiesińska-Figatowska M, Rokicki D, Walecki J, et al. **Menkes' disease with a Dandy-Walker variant: case report.** *Neuroradiology* 2001;43:948–50 CrossRef Medline
- Bernhard MK, Merckenschlager A, Mayer T, et al. **The spectrum of neuroradiological features in Menkes disease: widening of the cerebral venous sinuses.** *J Pediatr Neuroradiol* 2012;1:121–25
- Bindu PS, Taly AB, Kothari S, et al. **Electro-clinical features and magnetic resonance imaging correlates in Menkes disease.** *Brain Dev* 2013;35:398–405 CrossRef Medline
- Burgemeister AL, Zirn B, Oeffner F, et al. **Menkes disease with discordant phenotype in female monozygotic twins.** *Am J Med Genet A* 2015;167A:2826–29 CrossRef Medline
- Choudhary R, Choudhary A, Sitaraman S. **Menkes disease—a rare neurodegenerative disorder.** *J Nepal Paediatr Soc* 2016;35:177–80 CrossRef
- Cosimo QC, Daniela L, Elsa B, et al. **Kinky hair, kinky vessels, and bladder diverticula in Menkes disease.** *J Neuroimaging* 2011;21:e114–16 CrossRef Medline
- Ekici B, Çaliskan M, Tatli B. **Reversible temporal lobe edema: an early MRI finding in Menkes disease.** *J Pediatr Neurosci* 2012;7:160–61 CrossRef Medline
- Faerber EN, Grover WD, DeFilipp GJ, et al. **Cerebral MR of Menkes kinky-hair disease.** *AJNR Am J Neuroradiol* 1989;10:190–92 Medline
- Gandhi R, Kakkar R, Rajan S, et al. **Menkes kinky hair syndrome: a rare neurodegenerative disease.** *Case Rep Radiol* 2012;2012:684309 CrossRef Medline
- Geller TJ, Pan Y, Martin DS. **Early neuroradiologic evidence of degeneration in Menkes' disease.** *Pediatr Neurol* 1997;17:255–58 CrossRef Medline
- George S, Matthai SA, Sosamma MM, et al. **Menkes' kinky hair syndrome.** *Indian J Pediatr* 2005;72:891–92 CrossRef Medline
- Hsich GE, Robertson RL, Irons M, et al. **Cerebral infarction in Menkes' disease.** *Pediatr Neurol* 2000;23:425–28 CrossRef Medline
- Ito H, Mori K, Sakata M, et al. **Pathophysiology of the transient temporal lobe lesion in a patient with Menkes disease.** *Pediatr Int* 2008;50:825–27 CrossRef Medline
- Jacobs DS, Smith AS, Finelli DA, et al. **Menkes kinky hair disease: characteristic MR angiographic findings.** *AJNR Am J Neuroradiol* 1993;14:1160–63 Medline
- Jain P, Sharma S, Sankhyan N, et al. **Macrocephaly with diffuse white matter changes simulating a leukodystrophy in Menkes disease.** *Indian J Pediatr* 2013;80:160–62 CrossRef Medline
- Jayawant S, Halpin S, Wallace S. **Menkes kinky hair disease: an unusual case.** *Eur J Paediatr Neurol* 2000;4:131–34 CrossRef Medline
- Johnsen DE, Coleman L, Poe L. **MR of progressive neurodegenerative change in treated Menkes' kinky hair disease.** *Neuroradiology* 1991;33:181–82 CrossRef Medline
- Datta KA, Ghosh T, Nayak K, et al. **Menkes kinky hair disease: a case report.** *Cases J* 2008;1:158 CrossRef Medline
- Kim JH, Lee BH, Kim YM, et al. **Novel mutations and clinical outcomes of copper-histidine therapy in Menkes disease patients.** *Metab Brain Dis* 2015;30:75–81 CrossRef Medline
- Kim OH, Suh JH. **Intracranial and extracranial MR angiography in Menkes disease.** *Pediatr Radiol* 1997;27:782–84 CrossRef Medline
- Kim YH, Lee R, Yoo HW, et al. **Identification of a novel mutation in the ATP7A gene in a Korean patient with Menkes disease.** *J Korean Med Sci* 2011;26:951–53 CrossRef Medline
- Koprivsek K, Lucic M, Kozic D, et al. **Basal ganglia lesions in the early stage of Menkes disease.** *J Inherit Metabol Dis* 2010;33:301–02 CrossRef
- Lee ES, Ryoo JW, Choi DS, et al. **Diffusion-weighted MR imaging of**

- unusual white matter lesion in a patient with Menkes disease.** *Korean J Radiol* 2007;8:82–85 CrossRef Medline
26. Leventer RJ, Kornberg AJ, Phelan EM, et al. **Early magnetic resonance imaging findings in Menkes' disease.** *J Child Neurol* 1997;12:222–24 CrossRef Medline
  27. Lin YJ, Ho CS, Hsu CH, et al. **A truncating de novo point mutation in a young infant with severe Menkes disease.** *Pediatr Neonatol* 2017;58:89–92 CrossRef Medline
  28. Lubbe E. **From the coalface of clinical paediatric neurology: Menkes disease—a lesson not to be forgotten.** *S Afr J Child Health* 2012;6:56–59
  29. Okada T, Sasaki F, Honda S, et al. **Menkes disease with gastroesophageal reflux disease and successful surgical treatment: a case report and literature.** *Turk J Pediatr* 2010;52:333–35 Medline
  30. Ozawa H, Kodama H, Murata Y, et al. **Transient temporal lobe changes and a novel mutation in a patient with Menkes disease.** *Pediatr Int* 2001;43:437–40 CrossRef Medline
  31. Fister P, Raku J, Primec RZ, et al. **Menkes kinky hair disease (Menkes syndrome): a case report.** *Acta Dermatovenerol Alp Pannonica Adriat* 2006;15:126–30 Medline
  32. Park HD, Moon HK, Lee J, et al. **A novel ATP7A gross deletion mutation in a Korean patient with Menkes disease.** *Ann Clin Lab Sci* 2009;39:188–91 Medline
  33. Pinto F, Calderazzi A, Canapicchi R, et al. **Radiological findings in a case of Menkes' disease.** *Child Nervous Syst* 1995;11:112–14 CrossRef Medline
  34. Rego, JI, Rocha AJD, Segatelli V, et al. **Imaging features that allow for the recognition of Menkes disease.** *Arq Neuropsiquiatr* 2014;72:396 CrossRef Medline
  35. Rennert J, Doelken R, Doelken M, et al. **Menkes disease: MRI appearance of a rare neurodegenerative disorder.** *J Pediatr Neurol* 2009;7:317–20
  36. Rizk T, Mahmoud A, Jamali T, et al. **Menkes disease presenting with epilepsy partialis continua.** *Case Rep Neurol Med* 2014;2014:525784 CrossRef Medline
  37. Saha S, Mridha D. **An unusual cause for focal convulsions: Menkes kinky hair disease.** *J Pediatr Neurol* 2013;11:123–25
  38. Santos LM, Teixeira CD, Vilanova, LC, et al. **Menkes disease: case report of an uncommon presentation with white matter lesions.** *Arq Neuropsiquiatr* 2001;59:125–27 CrossRef Medline
  39. Sener RN. **Menkes' disease (trichopoliodystrophy).** March 23, 2001. <https://www.eurorad.org/eurorad/case.php?id=968&teaching=true>. Accessed April 4, 2017 CrossRef
  40. Seshadri R, Bindu PS, Gupta AK. **Teaching neuroimages: Menkes kinky hair syndrome.** *Neurology* 2013;81:12–13 CrossRef Medline
  41. Sirleto P, Surace C, Santos H, et al.  **Lyonization effects of the t (X;16) translocation on the phenotypic expression in a rare female with Menkes disease.** *Pediatr Res* 2009;65:347–51 CrossRef Medline
  42. Smpokou P, Samanta M, Berry GT, et al. **Menkes disease in affected females: the clinical disease spectrum.** *Am J Med Genet A* 2015;167A:417–20 CrossRef Medline
  43. Takahashi S, Ishii K, Matsumoto, K, et al. **Cranial MRI and MR angiography in Menkes' syndrome.** *Neuroradiology* 1993;35:556–58 CrossRef Medline
  44. Thomas B, Dossary N, Widjaja E. **MRI of childhood epilepsy due to inborn errors of metabolism.** *AJR Am J Roentgenol* 2010;194:W367–74 CrossRef Medline
  45. Venta-Sobero JA, Porras-Kattz E, Gutiérrez-Moctezuma J. **West syndrome as an epileptic presentation in Menkes' disease: two cases report [in Spanish].** *Rev Neurol* 2004;39:133–36 Medline
  46. Menkes disease. Radiopaedia.org. <http://radiopaedia.org/cases/menkes-disease-1>. April 4, 2017
  47. Zikou AK, Mouka V, Mpatoulis A, et al. **Menkes disease: alteration of MR findings over time.** May 14, 2015. <https://www.eurorad.org/eurorad/case.php?id=12713&lang=en>. Accessed April 4, 2017 CrossRef

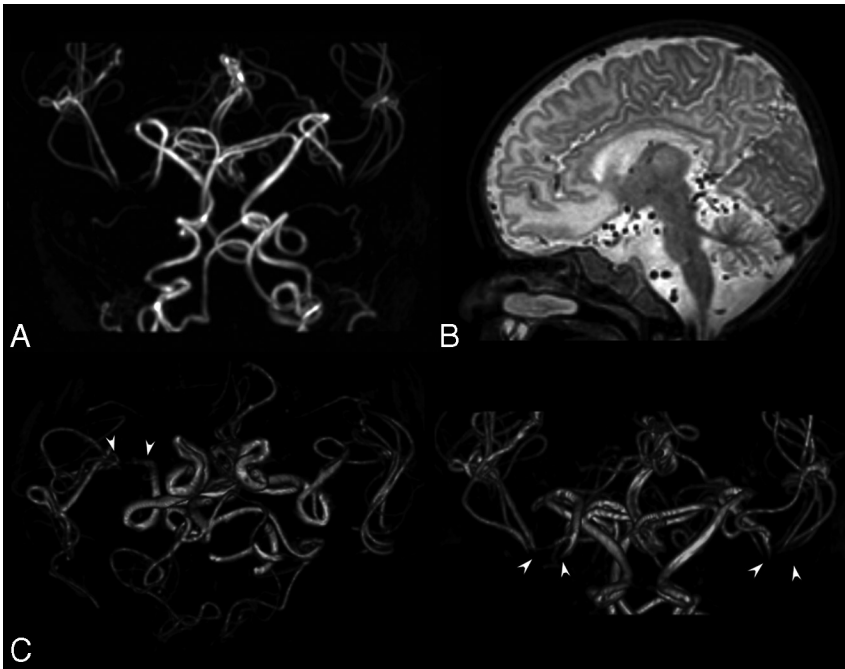

**ON-LINE FIG 1.** A, MR angiography (time-of-flight technique) of the extra-intracranial cerebroafferent arteries disclosing a typical increased vessel tortuosity in a 5-month-old boy affected by Menkes disease (patient 12). B, Parasagittal T2-weighted images in a 4-month-old boy. Note the numerous *black dots* corresponding to signal voids of the markedly tortuous intracranial arteries. C, 3D reconstruction (volume-rendering technique) of the intracranial arteries shown in A: cranio-caudal view: the middle cerebral arteries seem to present distal stenosis (*arrowheads*) bilaterally; frontal view: “stenosis” cluster in the lower portion of the tortuous branches, thus revealing the artifactual nature of the lumen changes due to downward blood flow.

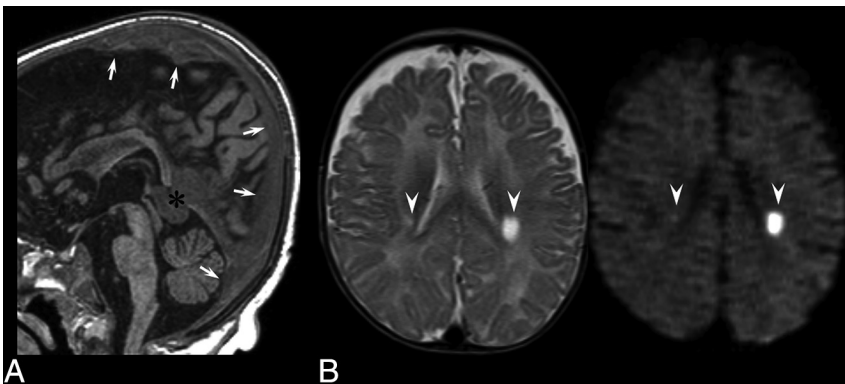

**ON-LINE FIG 2.** A, Midsagittal T1 image showing ectasia of the venous sinuses (*small white arrows*) in a 9-month-old boy (patient 4). The vein of Galen (*asterisk*) is also dilated. B, Axial T2 and diffusion-weighted images at the level of the centrum semiovale in an 8-month-old boy (patient 6) show an oval hyperintense lesion in the left hemisphere with decreased apparent diffusion coefficient values (not shown). A smaller mirror lesion in the contralateral hemisphere with identical signal features is also partially visible (*arrowheads*).

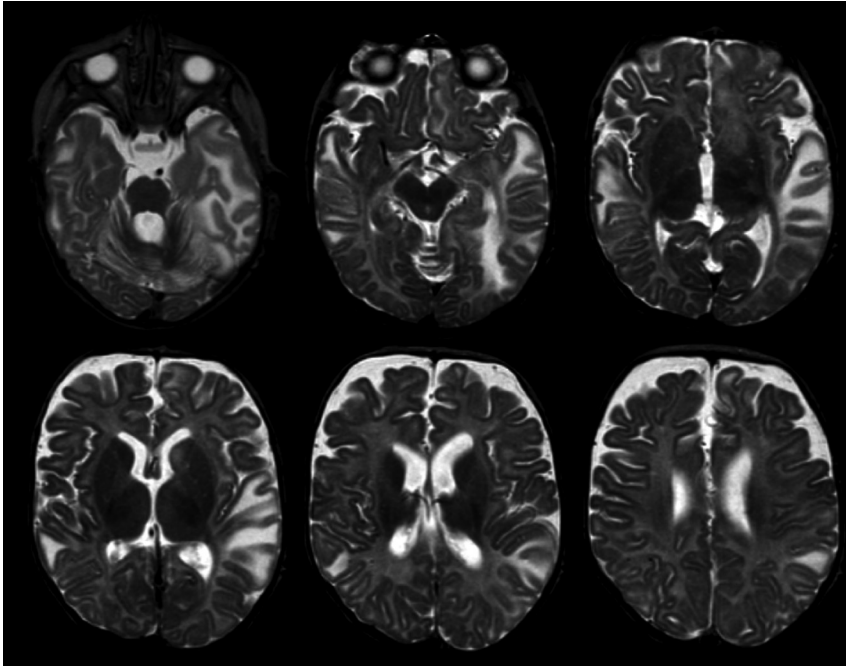

**ON-LINE FIG 3.** Axial T2 images in a 5-month-old boy (patient 10) showing bilateral but asymmetric tumefactive lesions involving the temporal lobes but also the parietal regions and the left frontal lobe (gyrus rectus and contiguous portion of the superior frontal gyrus). Note the left basal ganglia lesion, the cerebral (and cerebellar) atrophy, the global abnormal myelination for age, and the signs of increased vascular tortuosity (see the central image in the upper row disclosing the signal void of some arteries), which complete the neuroimaging involvement.

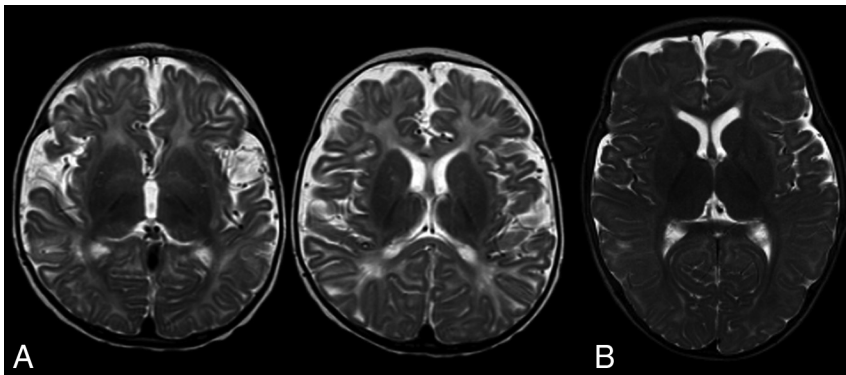

**ON-LINE FIG 4.** Axial T2-weighted images at the level of the basal ganglia. *A*, Image of a 9-month-old boy (patient 4) shows diffuse bilateral hyperintensity of the supratentorial white matter with sparing of the cortical spinal tract. Abnormal myelination in this child is probably due to the combination of delayed myelination and neurodegeneration. *B*, Image of a 7-month-old girl shows normal supratentorial myelination for comparison with *A*.

**On-line Table: Main neuroradiologic findings from the literature review and in our sample**

|                                 | Literature Review   |        |                     |        | Our Sample          |        |                    |        |
|---------------------------------|---------------------|--------|---------------------|--------|---------------------|--------|--------------------|--------|
|                                 | First MRI           |        | Follow-Up MRI       |        | First MRI           |        | Follow-Up MRI      |        |
|                                 | 62 Children with MD |        | 23 Children with MD |        | 26 Children with MD |        | 8 Children with MD |        |
|                                 | No.                 | %      | No.                 | %      | No.                 | %      | No.                | %      |
| <b>Intracranial vessels</b>     |                     |        |                     |        |                     |        |                    |        |
| Increased arterial tortuosity   |                     |        |                     |        |                     |        |                    |        |
| Yes                             | 45                  | (73%)  | 14                  | (61%)  | 26                  | (100%) | 8                  | (100%) |
| No                              | 2                   | (3%)   | 0                   | (0%)   | 0                   |        | 0                  |        |
| NR                              | 15                  | (24%)  | 9                   | (39%)  |                     |        |                    |        |
| Arterial stenosis and ectasia   |                     |        |                     |        |                     |        |                    |        |
| Yes                             | 0                   |        | 0                   |        | 0                   |        | 0                  |        |
| No                              | 0                   |        | 0                   |        | 17 <sup>a</sup>     | (100%) | 8                  | (100%) |
| NR                              | 62                  | (100%) | 23                  | (100%) |                     |        |                    |        |
| Ectasia of the venous sinuses   |                     |        |                     |        |                     |        |                    |        |
| Yes                             | 1                   | (1%)   | 0                   |        | 1                   | (4%)   | 1                  | (12%)  |
| No                              | 0                   |        | 0                   |        | 25                  | (96%)  | 7                  | (88%)  |
| NR                              | 61                  | (99%)  | 23                  | (100%) |                     |        |                    |        |
| <b>White matter involvement</b> |                     |        |                     |        |                     |        |                    |        |
| Tumefactive lesions             |                     |        |                     |        |                     |        |                    |        |
| Yes                             | 21                  | (33%)  | 3                   | (13%)  | 7                   | (27%)  | 2                  | (25%)  |
| No                              | 3                   | (5%)   | 7                   | (30%)  | 19                  | (73%)  | 6                  | (75%)  |
| NR                              | 38                  | (61%)  | 13                  | (56%)  |                     |        |                    |        |
| Centrum semiovale lesions       |                     |        |                     |        |                     |        |                    |        |
| Yes                             | 1                   | (1.6%) | 1                   | (4%)   | 1                   | (4%)   | 0                  |        |
| No                              | 0                   |        | 0                   |        | 25                  | (96%)  | 8                  | (100%) |
| NR                              | 61                  | (99%)  | 22                  | (96%)  |                     |        |                    |        |
| Nontumefactive lesions          |                     |        |                     |        |                     |        |                    |        |
| Yes                             | 14                  | (23%)  | 3                   | (13%)  | 9                   | (35%)  | 3                  | (38%)  |
| No                              | 0                   |        | 2                   | (9%)   | 17                  | (65%)  | 5                  | (62%)  |
| NR                              | 48                  | (77%)  | 18                  | (78%)  |                     |        |                    |        |
| <b>Abnormal myelination</b>     |                     |        |                     |        |                     |        |                    |        |
| Yes                             | 20                  | (32%)  | 9                   | (39%)  | 19                  | (73%)  | 7                  | (88%)  |
| No                              | 0                   |        | 0                   |        | 7                   | (27%)  | 1                  | (12%)  |
| NR                              | 42                  | (67%)  | 14                  | (61%)  |                     |        |                    |        |

**Note:**—NR indicates not reported/mentioned.

<sup>a</sup> Seventeen of 26 children with MD underwent MRA at the first examination; none presented with intracranial artery stenosis.
